# Supplementary figures and images for: Development of Polyclonal Antibodies and a Serological-Based Reverse-Transcription Loop-Mediated Isothermal Amplification (S-RT-LAMP) Assay for Rice Black-Streaked Dwarf Virus Detection in Both Rice and Small Brown Planthopper
Source: MDPI journal article supplement (doi:10.3390/v15102127), 2023-10-20

Supplementary Figure S1

1

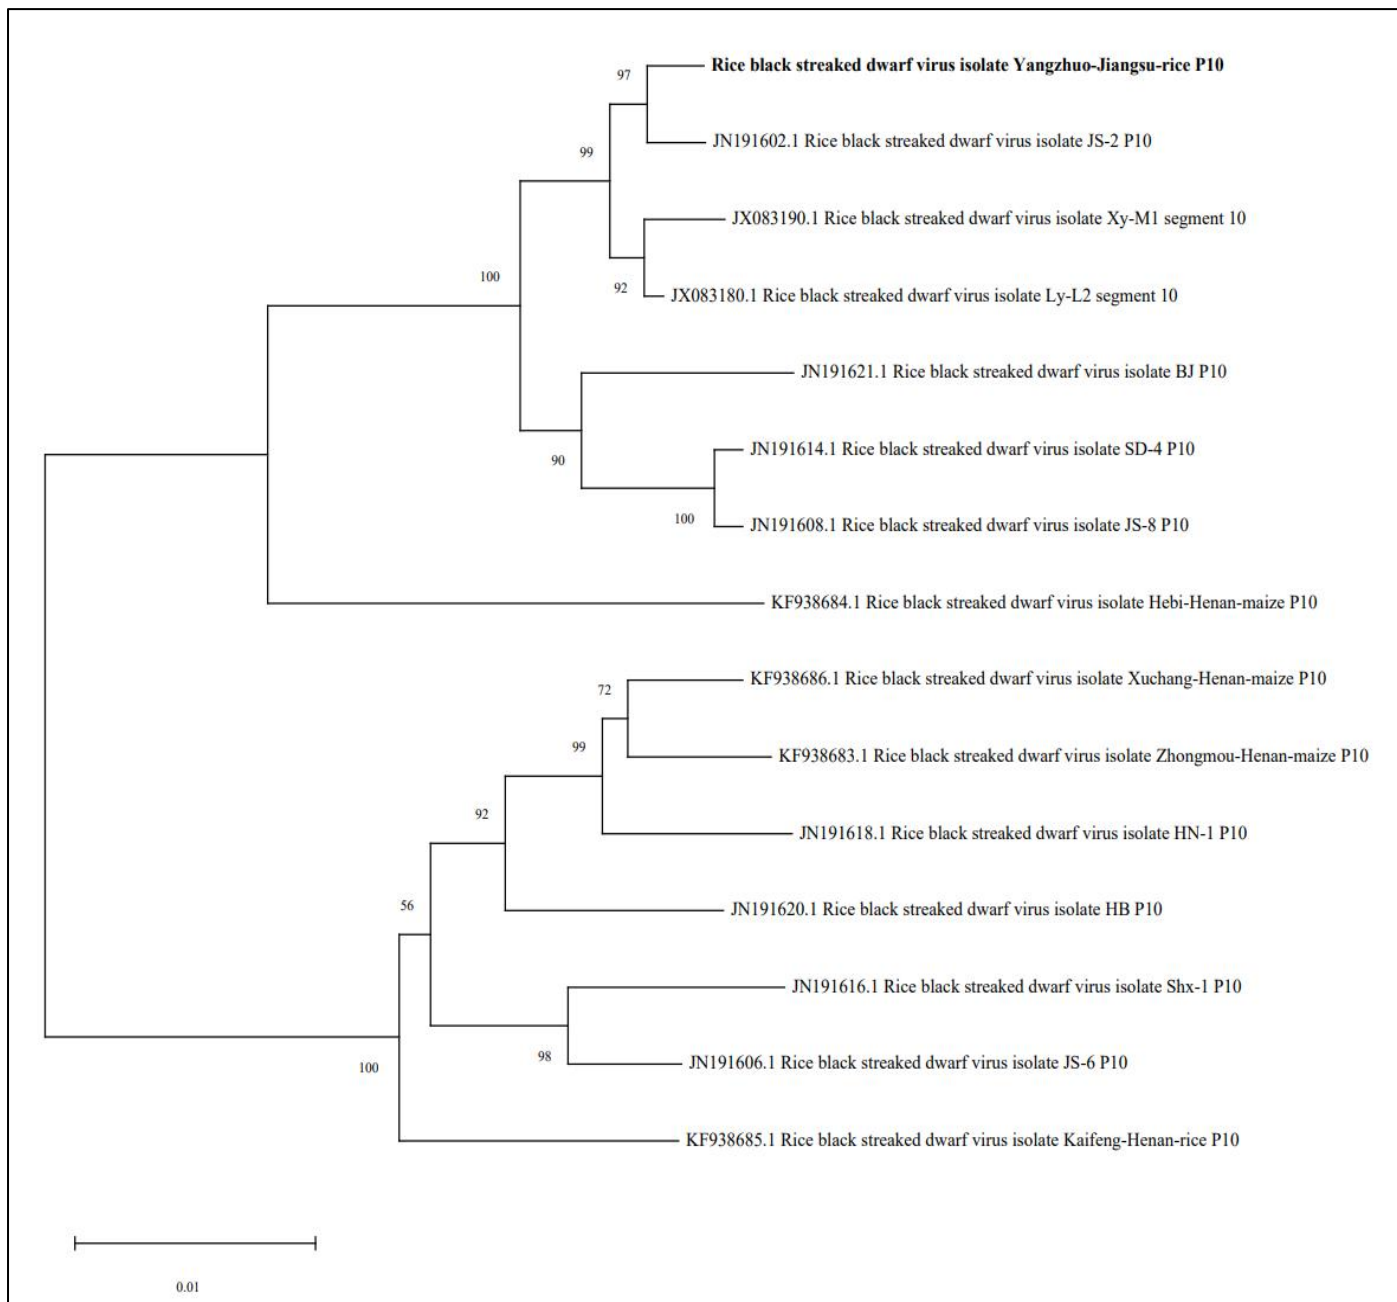

2

3

Supplement: s1 [file s1]
